# Supplementary material for: Regulation of hepatic mitochondrial oxidation by glucose-alanine cycling during starvation in humans
Source: JCI journal article supplement (doi:10.1172/jci129913), 2019-09-22
Supplement: sd1 [file 1]

## Supplemental Figure 1

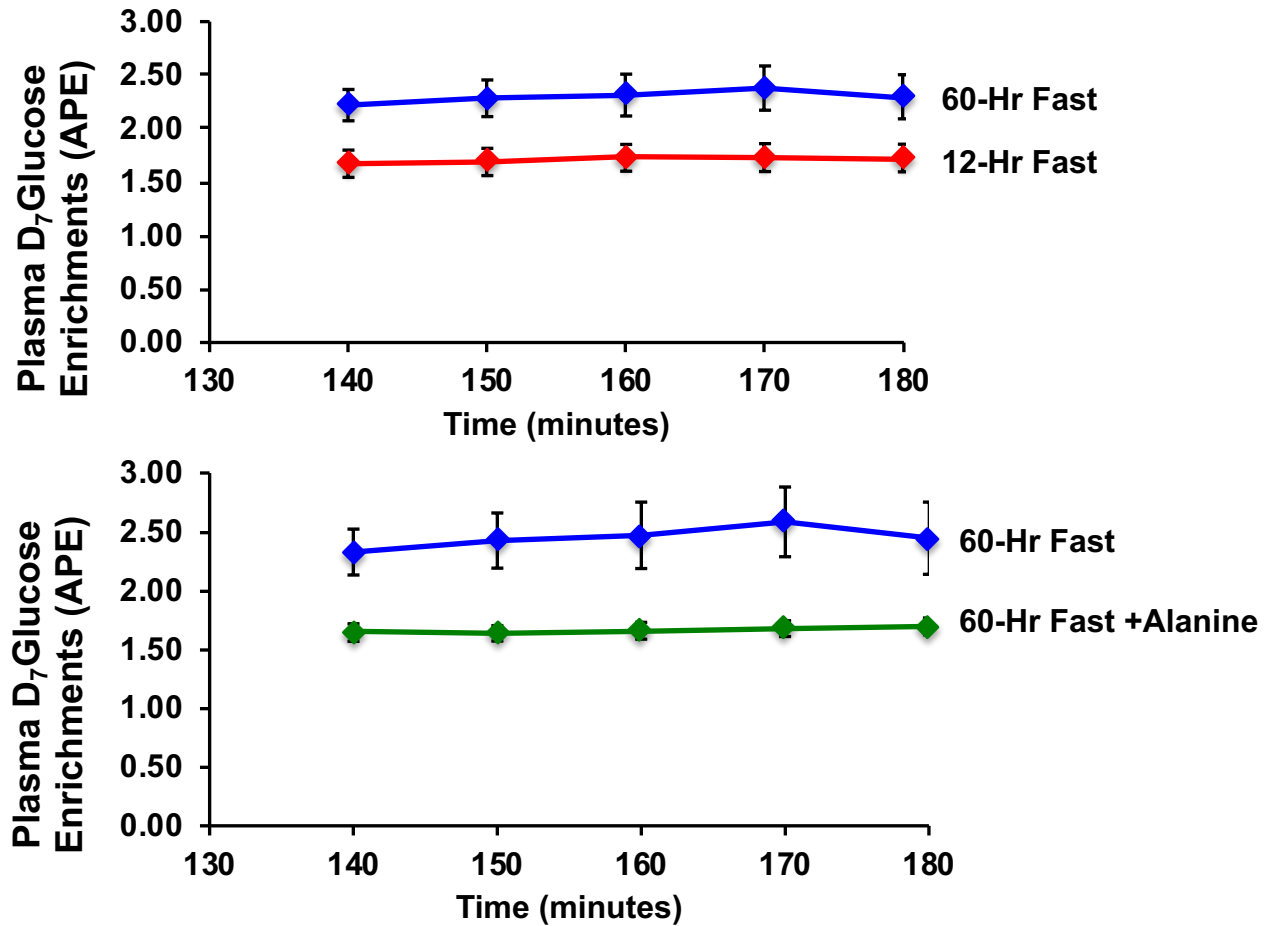

### Steady-state plasma D<sub>7</sub> glucose enrichments during PINTA

- A) Plasma enrichments of D<sub>7</sub>-glucose in healthy volunteers (n=15) after a 12-h and a 60-h fast.
- B) Plasma enrichments of D<sub>7</sub>-glucose in a subgroup of healthy volunteers (n=9) after a 60-h fast and a 60-h fast with alanine supplementation.

## Supplemental Figure 2

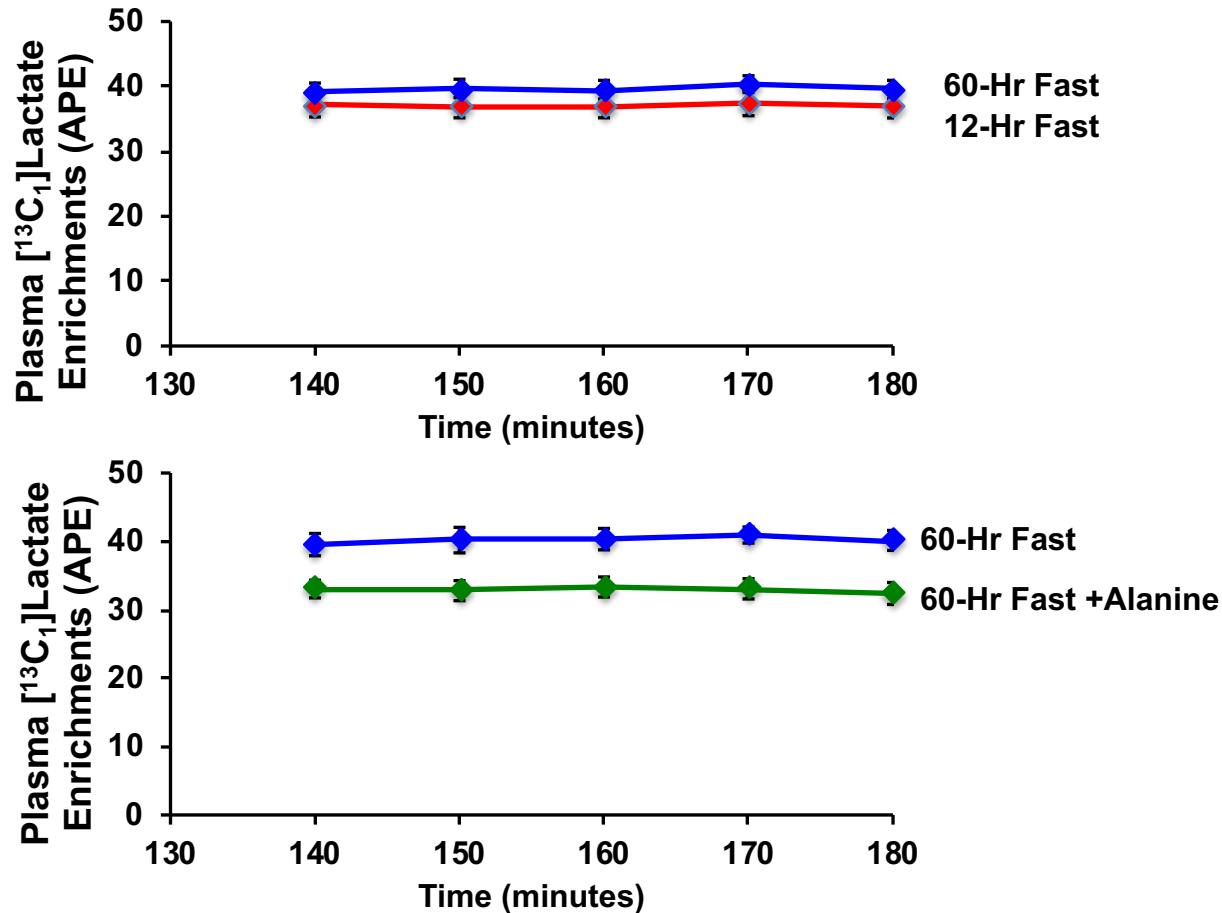

### Steady-state plasma $[^{13}\text{C}_1]$ lactate enrichments during PINTA

- A) Plasma enrichments of  $[^{13}\text{C}_1]$ lactate in healthy volunteers (n=15) after a 12-h and a 60-h fast.
- B) Plasma enrichments of  $[^{13}\text{C}_1]$ lactate in a subgroup of healthy volunteers (n=9) after a 60-h and a 60-h fast with alanine supplementation.

# Supplemental Figure 3

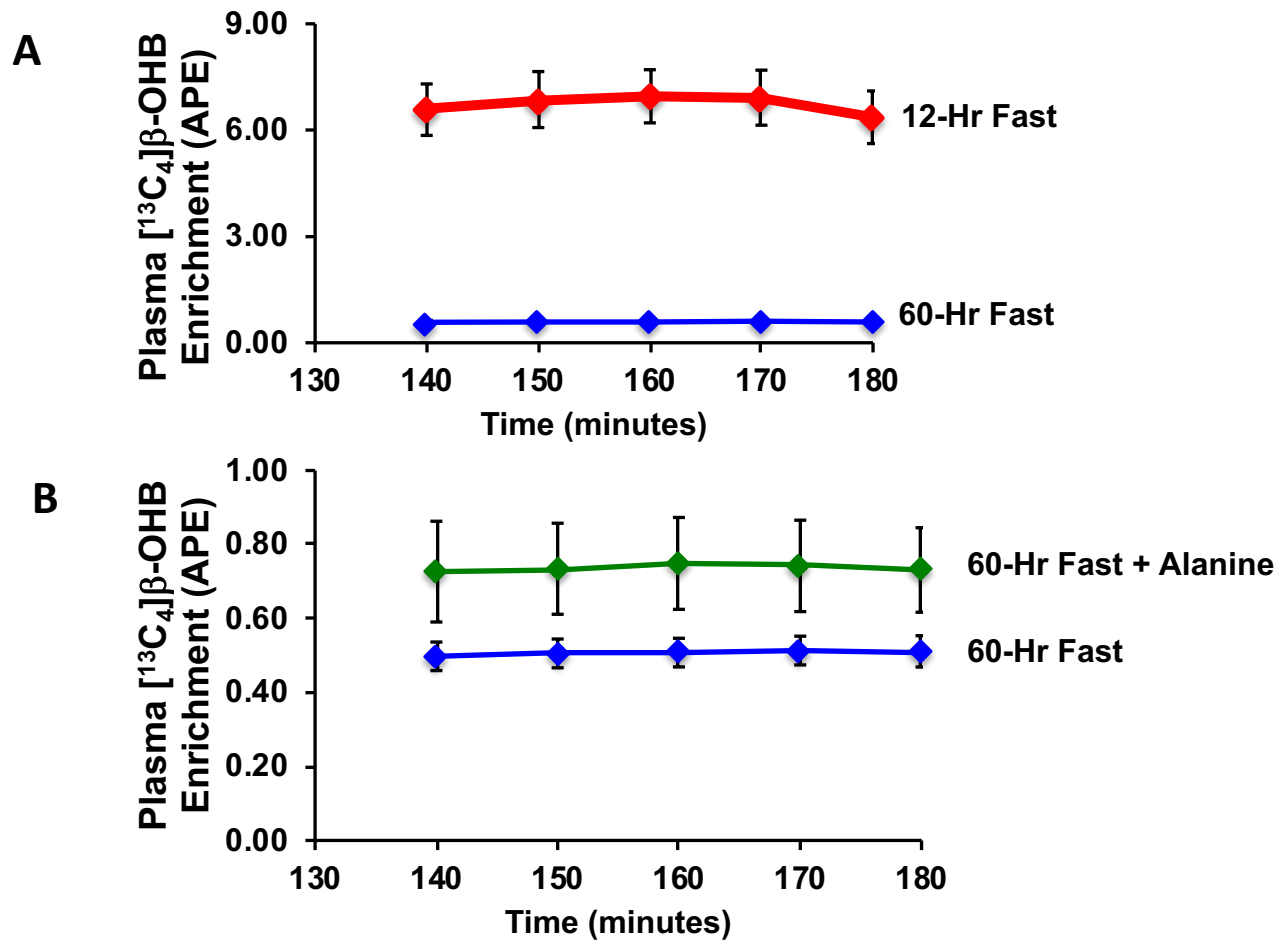

## Steady-state plasma [<sup>13</sup>C<sub>4</sub>]β-OHB enrichments during PINTA

- A) Plasma enrichments of [<sup>13</sup>C<sub>4</sub>]β-OHB in healthy volunteers (n=15) after a 12-h and a 60-h fast.
- B) Plasma enrichments of [<sup>13</sup>C<sub>4</sub>]β-OHB in a subgroup of healthy volunteers (n=9) after a 60-h and a 60-h fast with alanine supplementation.
